# Supplementary material
Source: publisher figshare collection journal article supplement (https://rs.figshare.com/ndownloader/files/34408995)
Supplement: Supplementary file 1 [file 34408995]

## Sheet: Supplementary material Table S1
Electronic supplementary material Table S1. Description (including chaîne opératoire steps) of nine medieval walrus rostra from Kyiv
From: Barrett, J.H., Khamaiko, N., Ferrari, G., Cuevas, A., Kneale, C., Hufthammer, A.K., Pálsdóttir, A.H. & Star, B. 2022 Walruses on the Dnieper: New evidence for the intercontinental trade of Greenlandic ivory in the Middle Ages. Proceedings of the Royal Society B. doi:10.1098/rspb.2021.2773
Rostrum number	Isotope sample	aDNA sample	Location of archived specimen	Find settlement	Find site	Museum number or other identifier	Date in centuries CE, based on archaeological context	Tusks present?	Type (as defined by Barrett et al. 2020)	Brief description	Description1	Rostrum removal method	Rostrum removal direction (mainly cut from)1	Finishing of the posterior margins	Shaping of the nasal aperture	Modifying the anterior surface between the tusks	Thinning the tusk sockets	Shaping the ventral margin between the tusks	Damaging the tusk sockets during tusk removal	Right tusk socket cross section max (mm)	Right tusk socket cross section min (mm)	Left tusk socket cross section max (mm)	Left tusk socket cross section min (mm)	Unsided tusk socket cross section max (mm)	Unsided tusk socket cross section min (mm)	Comments	References
R64	R64	WLR074	Centre of Archaeology Kyiv	Kyiv	35 Spaska, Kyiv, Podil-2007	2319; sample S_07-2-2319	late 12th C	no	2	roughly faceted rostrum	rostrum; the posterior surface shows closely spaced parallel chop marks from right ventral in the transverse plane; the posterior dorsal margin does not survive; on the anterior face the nasal aperture is not modified; the anterior surfaces to either side of the nasal aperture are partly flattened by cutting from lateral towards the midline, but without creating a central peak; surviving dorsal a…	incremental parallel cuts	right ventral	unobservable	unmodified	partly flattened	roughly facetted	arched?	broken	63						date has been revised since previous publications, where given as first half of 12th century	Сагайдак et al. 2008:143-144; Barrett et al. 2020; this study
R65	R65	WLR075	Centre of Archaeology Kyiv	Kyiv	35 Spaska, Kyiv, Podil-2007	2369; sample S_07-1-2369	late 12th C	no	2/3	roughly faceted rostrum	rostrum fragment (from the base of a left tusk socket); surviving surfaces and cross section show broad parallel facets created by closely spaced parallel chop marks from ventral; most bone of the tusk socket has been broken away; unlikely to match rostrum R66 from the same context (differing sizes)	unobservable	unobservable	unobservable	unobservable	unobservable	roughly facetted	unobservable	broken			61	41			date has been revised since previous publications, where given as early 12th century	Сагайдак et al. 2008:143-144; Barrett et al. 2020; this study
R66	R66	WLR076	Centre of Archaeology Kyiv	Kyiv	35 Spaska, Kyiv, Podil-2007	2825; sample S_07-1-2825	late 12th C	no	2/3	roughly faceted rostrum	rostrum fragment (from the wall of a tusk socket); closely spaced parallel chop marks delivered from ventral create wide parallel facets running ventral-dorsal along the surface of the tusk socket; broken away from a rostrum; unlikely to match rostrum R65 from the same context (differing sizes)	unobservable	unobservable	unobservable	unobservable	unobservable	roughly facetted	unobservable	broken					>63		date has been revised since previous publications, where given as early 12th century	Сагайдак et al. 2008:143-144; Barrett et al. 2020; this study
R71	R71	WLR077	Institute of Archaeology, National Academy of Sciences of Ukraine, Kyiv	Kyiv	35 Spaska, Kyiv, Podil-2011	2937; sample S_11-2-2937	mid 12th C	no	uncertain (1?)	undecorated rostrum	rostrum fragment (from the wall of a tusk socket); not including nasal aperture or posterior surface; no external modification of any kind; not facetted; large individual; max tusk socket cross section >63mm	unobservable	unobservable	unobservable	unobservable	unobservable	unmodified	unobservable	broken					>63			this study
R72	R72	WLR078	Institute of Archaeology, National Academy of Sciences of Ukraine, Kyiv	Kyiv	35 Spaska, Kyiv, Podil-2011	2938; sample S_11-2-2938	mid 12th C	no	2/3	roughly faceted rostrum	rostrum fragment; right tusk socket base; surviving portion of posterior margin shows parallel chops from right ventral; dorsal margin not preserved; only a tiny area of nasal aperture survives, but it is not modified at this point; dorsal exterior surface of tusk socket shows that it has been roughly facetted by applying parallel chops from ventral; not the same skull as R73 based on size	incremental parallel cuts	right ventral	unobservable	unobservable	unobservable	roughly facetted	unobservable	broken	37	25						this study
R73	R73	WLR079	Institute of Archaeology, National Academy of Sciences of Ukraine, Kyiv	Kyiv	35 Spaska, Kyiv, Podil-2011	2939; sample S_11-2-2939	mid 12th C	no	2/3	roughly faceted rostrum	rostrum; left tusk socket and nasal aperture intact; posterior surface shows very tidy parallel chop marks from ventral, obscured in places by finer trimming marks from lateral; posterior dorsal margin chamfered; nasal aperture is not trimmed internally or modified to a heart shape where it survives, but ventral tip is damaged; entire intact anterior surface flattened by parallel cuts, working fr…	incremental parallel cuts	ventral	chamfered	unmodified?	flattened	roughly facetted	arched?	broken			44	32				this study
R74	R74	WLR080	Institute of Archaeology, National Academy of Sciences of Ukraine, Kyiv	Kyiv	35 Spaska, Kyiv, Podil-2007	1833; sample S_11-3-1833	mid 12th C	no	uncertain	unclassified rostrum (fragment)	rostrum fragment; medial portion of left tusk socket and some adjoining bone; parallel cuts from right lateral on small surviving portion of posterior surface; posterior dorsal surface not present; nasal aperture not preserved; front of rostrum to medial of tusk socket flattened by parallel cuts delivered mostly from lateral; this flattening terminates to leave a raised midline ridge, similar in …	incremental parallel cuts	right lateral	unobservable	unobservable	flattened	unobservable	unmodified	broken								this study
R75	NA	NA	Institute of Archaeology, National Academy of Sciences of Ukraine, Kyiv	Kyiv	35 Spaska, Kyiv, Podil-2011	2940; sample S_11-2-2940	late 12th C	no	uncertain	unclassified rostrum (fragment)	rostrum fragment; small portion of tusk socket without preserved traces of modification	unobservable	unobservable	unobservable	unobservable	unobservable	unobservable	unobservable	broken								this study
R76	NA	NA	Institute of Archaeology, National Academy of Sciences of Ukraine, Kyiv	Kyiv	35 Spaska, Kyiv, Podil-2008	7174; sample S_08-2-7174	late 12th C	no	2/3	roughly faceted rostrum	rostrum fragment; dorsal portion of rostrum including part of the nasal aperture and a very small part of a tusk socket; traces of broad parallel facets created by closely spaced parallel chop marks	unobservable	unobservable	unobservable	unobservable	unobservable	roughly facetted	unobservable	broken								this study
1When describing cut marks the direction of inferred blade movement is noted in terms of anatomical orientation vis-a-vis a walrus skull, using the following conventions: from ventral indicates a cut from below, from dorsal indicates a cut from above, from lateral indicates a cut from the side, from medial indicates a cut working outward from the midline; from anterior means a cut from the front …
References
Barrett, J.H., Boessenkool, S., Kneale, C.J., O’Connell, T.C. & Star, B. 2020 Ecological globalisation, serial depletion and the medieval trade of walrus rostra. Quaternary Science Reviews 229, 106122. (doi:10.1016/j.quascirev.2019.106122).
Сагайдак, М.А., Хамайко, Н.В. & Вергун, О.И. 2008 Новые находки древнерусских игральных фигурок из Киева. In Стародавній Іско-ростень і слов’янські гради ІІ (ed. О.П. Моця), pp. 137-145. Коростень (Korosten), ІА НАН України.
